# Supplementary material for: Origins of reversing diastereoselectivity of α,β-dichloro-γ-butenolides and γ-butyrolactams in direct vinylogous aldol addition: a computational study
Source: Royal Society of Chemistry journal article supplement (doi:10.1039/c2ra21203j), 2012-01-01
Supplement: c2ra21203j.pdf [file c2ra21203j.pdf]

## Supplementary Information

# Origins of Reversal Diastereoselectivity of $\alpha,\beta$ -Dichloro- $\gamma$ -butenolides and $\gamma$ -Butyrolactams in Direct Vinylogous Aldol Addition: A Computational Study

Md Abdul Shafeeuulla Khan<sup>a</sup>, Ji Zhang<sup>b</sup>, Koushik Das Sarma<sup>\*c</sup> and Bishwajit Ganguly<sup>\*a</sup>

<sup>a</sup>*Analytical Science Discipline, Central Salt & Marine Chemicals Research Institute (Council of Scientific and Industrial Research), Bhavnagar, Gujarat, India-364 002*

<sup>b</sup>*King Kai—Ray Pharma, Mail Box 3016, Princeton, NJ 08540, USA*

<sup>c</sup>*Jubilant Chemsys Ltd., B-34, Sector-58, Noida, UP, India-201301*

*\*Corresponding Authors. Fax: (+91)-120-2586776, E-mail: [kdsarma@gmail.com](mailto:kdsarma@gmail.com); Fax: (+91)-278-2567562, E-mail: [ganguly@csmcri.org](mailto:ganguly@csmcri.org)*

| No. | List of Contents | Page No. |
|-----|------------------|----------|
| 1.  | Figure S1 & S2   | S2       |
| 2.  | Table S1         | S2       |
| 3.  | Figure S1 & 1A   | S3       |
| 4.  | 2A               | S4       |
| 5.  | 3A & 4A          | S5       |
| 6.  | 5A               | S6       |
| 7.  | 6A               | S7       |
| 8.  | 7A               | S8       |
| 9.  | 1S & 2S          | S9       |
| 10. | 3S               | S10      |
| 11. | 4S               | S11      |
| 12. | 5S               | S12      |
| 13. | 6S               | S13      |
| 14. | 7S               | S14      |

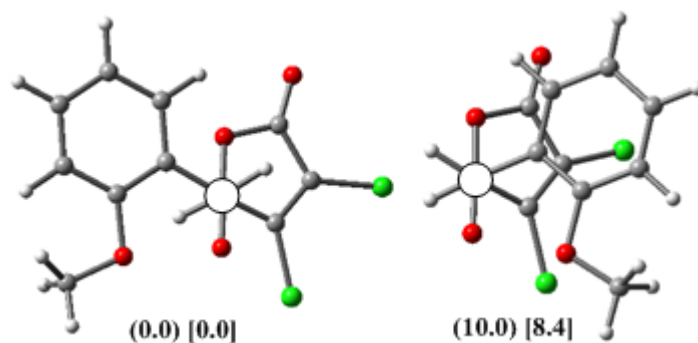

**Figure S1** B3LYP/cc-pVDZ optimized transition state geometries of *syn* (left) and *anti* (right) aldol products of  $\gamma$ -butenolides in solvent phase (methanol) along with the corresponding Gibb's free energies ( ) and electronic energies with ZPVE correction [ ].

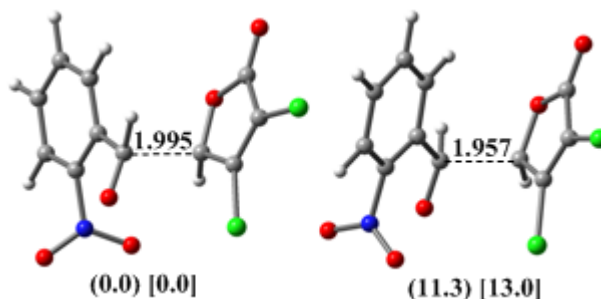

**Figure S2** B3LYP/cc-pVDZ optimized transition state geometries of *syn* (left) and *anti* (right) aldol products of  $\gamma$ -butenolides in solvent phase (methanol) along with the corresponding Gibb's free energies ( ) and electronic energies with ZPVE correction [ ].

**Table S1** Difference of distortion energies between *syn* and *anti* transition state geometries studied (given in kJ/mol).

| Difference between | Difference in distortion energies |
|--------------------|-----------------------------------|
| 1S & 1A            | 0.8                               |
| 2S & 2A            | 1.3                               |
| 3S & 3A            | 0.4                               |
| 4S & 4A            | 16.8                              |
| 5S & 5A            | -11.9                             |
| 6S & 6A            | -13.9                             |
| 7S & 7A            | 6.3                               |

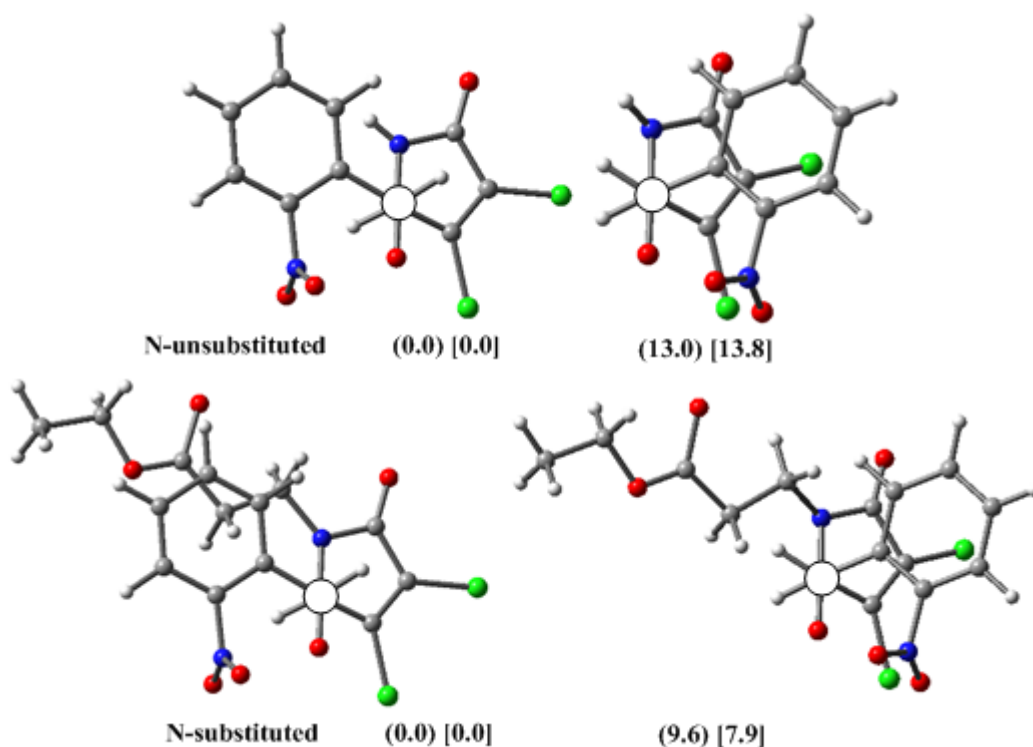

**Figure S3** B3LYP/cc-pVDZ optimized transition state geometries of *syn* (left) and *anti* (right) aldol products of  $\gamma$ -butyrolactams in solvent phase (methanol) along with the corresponding Gibb's free energies ( ) and electronic energies with ZPVE correction [ ].

**Cartesian coordinates of all optimized stationary points, including all the thermodynamic data generated from frequency calculation at B3LYP/cc-pVDZ in methanol solvent phase and imaginary frequencies of all transition states geometries.**

### 1A

Zero-point correction= 0.153306 (Hartree/Particle)  
 Thermal correction to Energy= 0.166862  
 Thermal correction to Enthalpy= 0.167807  
 Thermal correction to Gibbs Free Energy= 0.111057  
 Sum of electronic and zero-point Energies= -1569.460136  
 Sum of electronic and thermal Energies= -1569.446579  
 Sum of electronic and thermal Enthalpies= -1569.445635  
 Sum of electronic and thermal Free Energies= -1569.502385  
 1 Imaginary frequency = -228.3  $\text{cm}^{-1}$   
 Charge = -1, Multiplicity = 1

|    |            |             |             |
|----|------------|-------------|-------------|
| C  | 1.29782600 | 0.83162300  | -0.01852900 |
| C  | 1.70543200 | -0.47153100 | -0.10159800 |
| Cl | 2.32875100 | -1.33216100 | -1.47204900 |
| Cl | 1.36253300 | 2.01819400  | -1.27169600 |
| C  | 1.50180700 | -1.09064600 | 1.20019800  |
| O  | 1.70802900 | -2.22491900 | 1.59602500  |

|   |             |             |             |
|---|-------------|-------------|-------------|
| O | 0.97609300  | -0.11419900 | 2.02160400  |
| C | -1.13233800 | 1.48195200  | 1.25253200  |
| O | -1.29950100 | 2.68874800  | 0.87633500  |
| C | 0.72449300  | 1.07851000  | 1.28118300  |
| H | 1.04476600  | 1.96840300  | 1.83114200  |
| H | -1.22282000 | 1.23123900  | 2.34720400  |
| C | -1.75444000 | 0.35597600  | 0.43578300  |
| C | -1.89229300 | -0.94669200 | 0.94010200  |
| C | -2.24779600 | 0.63578900  | -0.84764900 |
| C | -2.49449200 | -1.95083700 | 0.17298100  |
| H | -1.53107600 | -1.17377900 | 1.94644400  |
| C | -2.84951600 | -0.36288400 | -1.61748400 |
| H | -2.15805000 | 1.66097600  | -1.21167100 |
| C | -2.97301300 | -1.66334500 | -1.11050900 |
| H | -2.59625300 | -2.96023600 | 0.58049800  |
| H | -3.23191400 | -0.12845200 | -2.61492100 |
| H | -3.44746600 | -2.44523400 | -1.70878700 |

## 2A

Zero-point correction= 0.151923 (Hartree/Particle)  
Thermal correction to Energy= 0.167332  
Thermal correction to Enthalpy= 0.168276  
Thermal correction to Gibbs Free Energy= 0.106863  
Sum of electronic and zero-point Energies= -1661.718455  
Sum of electronic and thermal Energies= -1661.703046  
Sum of electronic and thermal Enthalpies= -1661.702102  
Sum of electronic and thermal Free Energies= -1661.763515  
1 Imaginary frequency = -230.3 cm<sup>-1</sup>  
Charge = -1, Multiplicity = 1

|    |             |             |             |
|----|-------------|-------------|-------------|
| C  | 1.91125000  | 0.14484700  | -0.38862600 |
| C  | 1.65865800  | -1.16963500 | -0.10123500 |
| Cl | 1.43928500  | -2.49946300 | -1.19131500 |
| Cl | 2.15013800  | 0.83823400  | -1.95162000 |
| C  | 1.56383900  | -1.30385700 | 1.34456200  |
| O  | 1.34488400  | -2.26899100 | 2.05512100  |
| O  | 1.76706200  | -0.04080800 | 1.87015300  |
| C  | 0.45169700  | 2.22170000  | 0.89887300  |
| O  | 0.74415500  | 3.21700300  | 0.16738100  |
| C  | 1.88683700  | 0.91707100  | 0.82545300  |
| H  | 2.69142100  | 1.63250000  | 1.01623400  |
| H  | 0.56812200  | 2.29553700  | 2.01406900  |
| C  | -0.77945800 | 1.39440200  | 0.57188800  |
| C  | -1.31867200 | 0.46139900  | 1.47318300  |
| C  | -1.42364000 | 1.59949600  | -0.65904000 |
| C  | -2.46268100 | -0.26578100 | 1.15003500  |
| H  | -0.83941000 | 0.30751300  | 2.44213200  |
| C  | -2.56699100 | 0.88371900  | -0.99859100 |
| H  | -1.00324300 | 2.34969500  | -1.33015300 |
| C  | -3.09390300 | -0.05951800 | -0.09229600 |
| H  | -2.87701300 | -0.98927200 | 1.85426600  |
| H  | -3.06496600 | 1.04963100  | -1.95580000 |
| C  | -4.27568400 | -0.79951800 | -0.42896400 |
| N  | -5.23591900 | -1.40118600 | -0.70336300 |

### 3A

Zero-point correction= 0.185419 (Hartree/Particle)  
Thermal correction to Energy= 0.201606  
Thermal correction to Enthalpy= 0.202550  
Thermal correction to Gibbs Free Energy= 0.139737  
Sum of electronic and zero-point Energies= -1683.958359  
Sum of electronic and thermal Energies= -1683.942172  
Sum of electronic and thermal Enthalpies= -1683.941228  
Sum of electronic and thermal Free Energies= -1684.004041  
1 Imaginary frequency = -231.2 cm<sup>-1</sup>  
Charge = -1, Multiplicity =1

|    |             |             |             |
|----|-------------|-------------|-------------|
| C  | -1.53429800 | -1.02207000 | 0.07968400  |
| C  | -2.02642100 | -0.02445000 | -0.71678500 |
| Cl | -2.10573100 | 0.04763600  | -2.44766700 |
| Cl | -0.90886600 | -2.54648600 | -0.43788900 |
| C  | -2.47959200 | 1.05725200  | 0.14547400  |
| O  | -2.97651800 | 2.14055900  | -0.11068600 |
| O  | -2.24048300 | 0.65140200  | 1.44289700  |
| C  | 0.18525400  | -0.39975300 | 2.23070700  |
| O  | 0.64351400  | -1.54999600 | 2.53482500  |
| C  | -1.54680300 | -0.59360500 | 1.45541100  |
| H  | -1.95069900 | -1.27313300 | 2.21151400  |
| H  | -0.23331700 | 0.25680000  | 3.04323400  |
| C  | 0.94981000  | 0.46513700  | 1.23590100  |
| C  | 0.69104100  | 1.83216400  | 1.07257800  |
| C  | 1.97387400  | -0.14151600 | 0.49116700  |
| C  | 1.44511100  | 2.57982400  | 0.15733600  |
| H  | -0.09187500 | 2.31299100  | 1.66281200  |
| C  | 2.72306100  | 0.60689200  | -0.42307900 |
| H  | 2.15672200  | -1.19874300 | 0.67946800  |
| C  | 2.45487400  | 1.97814000  | -0.59223900 |
| H  | 1.24632300  | 3.64713700  | 0.02866700  |
| O  | 3.73876100  | 0.10303300  | -1.19058000 |
| C  | 4.04901300  | -1.28014300 | -1.06140300 |
| H  | 4.87032700  | -1.47319400 | -1.76374700 |
| H  | 4.37871200  | -1.52981400 | -0.03790000 |
| H  | 3.18645100  | -1.91679500 | -1.32389500 |
| H  | 3.05377100  | 2.54798400  | -1.30585000 |

### 4A

Zero-point correction= 0.197718 (Hartree/Particle)  
Thermal correction to Energy= 0.218694  
Thermal correction to Enthalpy= 0.219638  
Thermal correction to Gibbs Free Energy= 0.144941  
Sum of electronic and zero-point Energies= -2001.825197  
Sum of electronic and thermal Energies= -2001.804221  
Sum of electronic and thermal Enthalpies= -2001.803277  
Sum of electronic and thermal Free Energies= -2001.877974  
1 Imaginary frequency = -229.6 cm<sup>-1</sup>  
Charge = -1, Multiplicity =1

|   |             |             |            |
|---|-------------|-------------|------------|
| C | -2.52061700 | -0.13534100 | 0.52818200 |
| C | -2.30104700 | -1.48627500 | 0.48561900 |

|    |             |             |             |
|----|-------------|-------------|-------------|
| Cl | -1.87236700 | -2.55975900 | 1.77615200  |
| Cl | -2.50834700 | 0.87103400  | 1.92980000  |
| C  | -2.47192000 | -1.92760400 | -0.89007900 |
| O  | -2.37026500 | -3.02519200 | -1.40764700 |
| O  | -2.78836200 | -0.79935600 | -1.62702200 |
| C  | -1.37336000 | 1.62070400  | -1.47538900 |
| O  | -1.59245800 | 2.77041600  | -0.99521500 |
| C  | -2.73297400 | 0.35928200  | -0.80592900 |
| H  | -3.56787100 | 1.03879700  | -0.99580700 |
| H  | -1.68375200 | 1.37403800  | -2.52385400 |
| C  | -0.06412100 | 0.92641900  | -1.16099200 |
| C  | 0.29200700  | -0.29799500 | -1.75621000 |
| C  | 0.86669600  | 1.48752500  | -0.27340100 |
| C  | 1.48476300  | -0.94298400 | -1.44416200 |
| H  | -0.39036000 | -0.74391600 | -2.48067700 |
| C  | 2.06083400  | 0.85798600  | 0.06478300  |
| C  | 2.37706700  | -0.37500500 | -0.52134600 |
| H  | 1.74414300  | -1.89442200 | -1.90955700 |
| H  | 2.75102400  | 1.32836000  | 0.76394100  |
| N  | 0.67635000  | 2.83199000  | 0.32696700  |
| O  | 1.04243600  | 3.79226100  | -0.33768200 |
| O  | 0.30418900  | 2.88379500  | 1.49255200  |
| C  | 3.64082600  | -1.10061200 | -0.20924400 |
| O  | 3.95896600  | -2.16598300 | -0.70606600 |
| O  | 4.40062000  | -0.44700600 | 0.69041300  |
| C  | 5.64101600  | -1.08501100 | 1.04886700  |
| H  | 6.11659700  | -0.41593800 | 1.77483400  |
| H  | 5.45143100  | -2.07018300 | 1.49928200  |
| H  | 6.28044600  | -1.21037000 | 0.16302000  |

## 5A

Zero-point correction= 0.294950 (Hartree/Particle)  
Thermal correction to Energy= 0.320074  
Thermal correction to Enthalpy= 0.321018  
Thermal correction to Gibbs Free Energy= 0.234589  
Sum of electronic and zero-point Energies= -2099.819195  
Sum of electronic and thermal Energies= -2099.794070  
Sum of electronic and thermal Enthalpies= -2099.793126  
Sum of electronic and thermal Free Energies= -2099.879556  
1 Imaginary frequency = -192.7 cm<sup>-1</sup>  
Charge = -1, Multiplicity = 1

|    |             |             |             |
|----|-------------|-------------|-------------|
| C  | -0.44744300 | 1.91889400  | 0.24034000  |
| C  | -0.52030400 | 1.69764400  | -1.10234700 |
| Cl | -1.53461700 | 2.47803300  | -2.27448600 |
| Cl | -1.31850500 | 3.12100400  | 1.13217200  |
| C  | 0.43174900  | 0.63126900  | -1.46309600 |
| O  | 0.68318500  | 0.14770500  | -2.57142300 |
| C  | -0.44942000 | -0.13547400 | 2.11707700  |
| O  | -0.60049500 | 0.50338000  | 3.21402100  |
| C  | 0.44890500  | 0.95277200  | 0.86511300  |
| H  | 1.18099900  | 1.35108400  | 1.57731000  |
| H  | 0.32906000  | -0.94773000 | 2.06777000  |
| C  | -1.68706600 | -0.61177800 | 1.37242200  |
| C  | -1.63014200 | -1.55623600 | 0.33122900  |

|   |             |             |             |
|---|-------------|-------------|-------------|
| C | -2.94172800 | -0.11686700 | 1.76970100  |
| C | -2.78828000 | -1.97928500 | -0.31701800 |
| H | -0.66888800 | -1.97816500 | 0.03176400  |
| C | -4.11038600 | -0.52589600 | 1.13669200  |
| H | -2.96093200 | 0.58946300  | 2.60020000  |
| C | -4.01928500 | -1.45434000 | 0.09210600  |
| H | -2.75711000 | -2.70915300 | -1.12457000 |
| H | -5.08788500 | -0.14941800 | 1.43549000  |
| N | -5.24113800 | -1.89543100 | -0.58039100 |
| O | -6.31547400 | -1.42744800 | -0.20254900 |
| O | -5.14096900 | -2.71301900 | -1.49556400 |
| N | 1.01216100  | 0.26120300  | -0.26199400 |
| C | 2.10898300  | -0.68653200 | -0.18786700 |
| H | 1.99471000  | -1.30537700 | 0.71363700  |
| H | 2.02758400  | -1.34830900 | -1.06107500 |
| C | 3.47946400  | 0.00027800  | -0.18176000 |
| H | 3.62840400  | 0.58421100  | -1.10466100 |
| H | 3.56116300  | 0.71866000  | 0.65110500  |
| C | 4.61677700  | -0.98905600 | -0.05584500 |
| O | 4.48652100  | -2.19229900 | 0.06261600  |
| O | 5.80908200  | -0.36695000 | -0.08777600 |
| C | 6.98496000  | -1.21050200 | 0.03279800  |
| H | 6.99105400  | -1.92725400 | -0.80341000 |
| H | 6.91179500  | -1.78554400 | 0.96901700  |
| C | 8.19770100  | -0.30382100 | 0.01377500  |
| H | 8.17112900  | 0.40789600  | 0.85369800  |
| H | 9.11366200  | -0.90860200 | 0.10188200  |
| H | 8.24946700  | 0.26684300  | -0.92664300 |

## 6A

Zero-point correction= 0.305485 (Hartree/Particle)  
Thermal correction to Energy= 0.329335  
Thermal correction to Enthalpy= 0.330280  
Thermal correction to Gibbs Free Energy= 0.246334  
Sum of electronic and zero-point Energies= -2063.665318  
Sum of electronic and thermal Energies= -2063.641468  
Sum of electronic and thermal Enthalpies= -2063.640523  
Sum of electronic and thermal Free Energies= -2063.724469  
1 Imaginary frequency = -196.3 cm<sup>-1</sup>  
Charge = -1, Multiplicity = 1

|    |             |             |             |
|----|-------------|-------------|-------------|
| C  | -0.68676000 | 2.07328300  | 0.11956000  |
| C  | -0.70298300 | 1.74837900  | -1.20431800 |
| Cl | -1.77818000 | 2.31365200  | -2.44438500 |
| Cl | -1.71536100 | 3.22239500  | 0.90829400  |
| C  | 0.37823700  | 0.78243100  | -1.47126900 |
| O  | 0.71614000  | 0.25748700  | -2.53761100 |
| C  | -0.49205400 | 0.17754900  | 2.15017000  |
| O  | -0.75960500 | 0.88012600  | 3.18329800  |
| C  | 0.30384700  | 1.26966300  | 0.82545300  |
| H  | 0.96885700  | 1.80064400  | 1.51642600  |
| H  | 0.38686200  | -0.52533100 | 2.18589300  |
| C  | -1.63289500 | -0.51688100 | 1.42377300  |
| C  | -1.42132000 | -1.52028300 | 0.46067600  |
| C  | -2.95290100 | -0.17092400 | 1.76266800  |

|   |             |             |             |
|---|-------------|-------------|-------------|
| C | -2.49404800 | -2.14797200 | -0.16798700 |
| H | -0.40388000 | -1.82514500 | 0.20882000  |
| C | -4.03853700 | -0.78511100 | 1.14783000  |
| H | -3.08822800 | 0.58660100  | 2.53526800  |
| C | -3.79524300 | -1.76956600 | 0.18189000  |
| H | -2.34317400 | -2.92648200 | -0.91423400 |
| H | -5.06553000 | -0.52680700 | 1.40293800  |
| N | -4.92784700 | -2.42978900 | -0.46693700 |
| O | -6.06549600 | -2.08530900 | -0.14574500 |
| O | -4.69332700 | -3.29955800 | -1.30637400 |
| N | 0.96795200  | 0.56815500  | -0.23766300 |
| C | 2.18640900  | -0.20715800 | -0.08591800 |
| H | 2.18105000  | -0.68490600 | 0.90527100  |
| H | 2.16889900  | -1.00238800 | -0.84614200 |
| C | 3.46574800  | 0.64194900  | -0.25786200 |
| H | 3.43790800  | 1.10643600  | -1.25631100 |
| H | 3.45739300  | 1.45569400  | 0.48510900  |
| C | 4.72285300  | -0.18517500 | -0.10561500 |
| C | 5.35282400  | -0.31930300 | 1.14271300  |
| C | 5.26830600  | -0.87083800 | -1.20418800 |
| C | 6.49524600  | -1.11273400 | 1.29046700  |
| H | 4.94638300  | 0.21046600  | 2.00883000  |
| C | 6.41003900  | -1.66546800 | -1.06112700 |
| H | 4.79513700  | -0.77496700 | -2.18552600 |
| C | 7.02818100  | -1.78935300 | 0.18808500  |
| H | 6.97295100  | -1.19907600 | 2.26947600  |
| H | 6.82106700  | -2.18626300 | -1.92942600 |
| H | 7.92236500  | -2.40672900 | 0.30081000  |

## 7A

Zero-point correction= 0.168120 (Hartree/Particle)  
Thermal correction to Energy= 0.184554  
Thermal correction to Enthalpy= 0.185498  
Thermal correction to Gibbs Free Energy= 0.121499  
Sum of electronic and zero-point Energies= -1754.109467  
Sum of electronic and thermal Energies= -1754.093033  
Sum of electronic and thermal Enthalpies= -1754.092089  
Sum of electronic and thermal Free Energies= -1754.156087  
1 Imaginary frequency = -210.1 cm<sup>-1</sup>  
Charge = -1, Multiplicity = 1

|    |             |             |             |
|----|-------------|-------------|-------------|
| C  | -2.10607600 | 0.12406300  | 0.49629600  |
| C  | -1.89545000 | -1.19661000 | 0.22543000  |
| Cl | -1.52051600 | -2.48212600 | 1.33016900  |
| Cl | -2.15918900 | 0.85900100  | 2.06541500  |
| C  | -1.98823400 | -1.40600700 | -1.23423600 |
| O  | -1.82907500 | -2.43944700 | -1.88885200 |
| C  | -0.90337500 | 2.19797100  | -1.00777300 |
| O  | -1.17671300 | 3.24310100  | -0.33148200 |
| C  | -2.26244700 | 0.87852500  | -0.73873200 |
| H  | -3.08969000 | 1.59576800  | -0.77995900 |
| H  | -1.07603200 | 2.20413000  | -2.12105600 |
| C  | 0.38260400  | 1.44639800  | -0.71083500 |
| C  | 0.91467900  | 0.47786700  | -1.58131000 |
| C  | 1.08696900  | 1.75981200  | 0.46546600  |



|   |             |             |             |
|---|-------------|-------------|-------------|
| C | 2.10289700  | -0.18295200 | -1.27832100 |
| H | 0.39873900  | 0.24530900  | -2.51484200 |
| C | 2.27471100  | 1.11254300  | 0.78704900  |
| H | 0.67107200  | 2.53675400  | 1.10770900  |
| C | 2.76979100  | 0.14040300  | -0.09130800 |
| H | 2.52479300  | -0.93456000 | -1.94384300 |
| H | 2.82850100  | 1.34654500  | 1.69533100  |
| N | 4.02121400  | -0.54417800 | 0.23267300  |
| O | 4.59341900  | -0.24634300 | 1.28142500  |
| O | 4.44552300  | -1.38871200 | -0.55646900 |
| N | -2.29306600 | -0.15440000 | -1.72844600 |
| H | -2.32107400 | 0.02834400  | -2.72520200 |

## 1S

|                                              |                             |
|----------------------------------------------|-----------------------------|
| Zero-point correction=                       | 0.153028 (Hartree/Particle) |
| Thermal correction to Energy=                | 0.166705                    |
| Thermal correction to Enthalpy=              | 0.167649                    |
| Thermal correction to Gibbs Free Energy=     | 0.110055                    |
| Sum of electronic and zero-point Energies=   | -1569.460595                |
| Sum of electronic and thermal Energies=      | -1569.446918                |
| Sum of electronic and thermal Enthalpies=    | -1569.445974                |
| Sum of electronic and thermal Free Energies= | -1569.503568                |
| 1 Imaginary frequency =                      | -237.1 cm <sup>-1</sup>     |
| Charge = -1, Multiplicity =                  | 1                           |

|    |             |             |             |
|----|-------------|-------------|-------------|
| C  | -1.63523300 | 0.60803200  | -0.39865600 |
| C  | -2.35504100 | -0.51802400 | -0.09947400 |
| Cl | -4.00889900 | -0.64932600 | 0.40584900  |
| Cl | -2.21508100 | 2.23240500  | -0.40729500 |
| C  | -1.48198300 | -1.66907700 | -0.27081900 |
| O  | -1.67637300 | -2.86278600 | -0.11323600 |
| O  | -0.25991500 | -1.17557000 | -0.67883800 |
| C  | 0.81864200  | 0.82054600  | 0.83052600  |
| C  | 2.18148400  | 0.26245600  | 0.41480500  |
| C  | 3.14331900  | 1.14849700  | -0.09267800 |
| C  | 2.52561300  | -1.08969700 | 0.56572400  |
| C  | 4.41316900  | 0.69558700  | -0.46123600 |
| H  | 2.86729200  | 2.20215400  | -0.17258600 |
| C  | 3.79807400  | -1.54733300 | 0.20621700  |
| H  | 1.78956900  | -1.78910000 | 0.96930600  |
| C  | 4.74588800  | -0.65697700 | -0.31319200 |
| H  | 5.15140900  | 1.39859900  | -0.85716800 |
| H  | 4.05333700  | -2.60280400 | 0.33390200  |
| H  | 5.73983700  | -1.01414400 | -0.59420400 |
| H  | 0.31870200  | 0.10599000  | 1.54575500  |
| O  | 0.71995200  | 2.07473700  | 1.02319500  |
| C  | -0.26060500 | 0.24864800  | -0.63936000 |
| H  | 0.25824500  | 0.67996600  | -1.50052100 |

## 2S

|                                          |                             |
|------------------------------------------|-----------------------------|
| Zero-point correction=                   | 0.151711 (Hartree/Particle) |
| Thermal correction to Energy=            | 0.167204                    |
| Thermal correction to Enthalpy=          | 0.168148                    |
| Thermal correction to Gibbs Free Energy= | 0.106287                    |

Sum of electronic and zero-point Energies= -1661.718807  
Sum of electronic and thermal Energies= -1661.703315  
Sum of electronic and thermal Enthalpies= -1661.702370  
Sum of electronic and thermal Free Energies= -1661.764232  
1 Imaginary frequency = -234.5 cm<sup>-1</sup>  
Charge = -1, Multiplicity =1

|    |             |             |             |
|----|-------------|-------------|-------------|
| C  | -2.20936900 | 0.51830800  | -0.46538000 |
| C  | -2.87875900 | -0.63232000 | -0.13868800 |
| Cl | -4.54475800 | -0.83400800 | 0.29670400  |
| Cl | -2.87199500 | 2.10551500  | -0.58467600 |
| C  | -1.93539500 | -1.73661700 | -0.20635300 |
| O  | -2.06662700 | -2.93002600 | 0.00598300  |
| O  | -0.72179200 | -1.19096600 | -0.58253400 |
| C  | 0.14478900  | 0.94758100  | 0.92282700  |
| C  | 1.56064100  | 0.50397800  | 0.56627800  |
| C  | 2.46676200  | 1.47473300  | 0.11020000  |
| C  | 2.00529500  | -0.81929500 | 0.72229200  |
| C  | 3.77958300  | 1.13980700  | -0.20714600 |
| H  | 2.10822300  | 2.50217500  | 0.02785100  |
| C  | 3.31816000  | -1.17211600 | 0.41780500  |
| H  | 1.31452200  | -1.58123100 | 1.08726200  |
| C  | 4.21423900  | -0.19235600 | -0.05461900 |
| H  | 4.47808900  | 1.89899900  | -0.56409600 |
| H  | 3.65955100  | -2.20091600 | 0.54507900  |
| H  | -0.33777800 | 0.19734100  | 1.60769200  |
| O  | -0.07115100 | 2.18561100  | 1.08148000  |
| C  | -0.81131300 | 0.22670600  | -0.62557300 |
| H  | -0.26187400 | 0.65217800  | -1.46976000 |
| C  | 5.56735200  | -0.54847300 | -0.37068700 |
| N  | 6.66695900  | -0.83724600 | -0.62909600 |

### 3S

Zero-point correction= 0.185109 (Hartree/Particle)  
Thermal correction to Energy= 0.201416  
Thermal correction to Enthalpy= 0.202360  
Thermal correction to Gibbs Free Energy= 0.138562  
Sum of electronic and zero-point Energies= -1683.958638  
Sum of electronic and thermal Energies= -1683.942331  
Sum of electronic and thermal Enthalpies= -1683.941387  
Sum of electronic and thermal Free Energies= -1684.005185  
1 Imaginary frequency = -239.2 cm<sup>-1</sup>  
Charge = -1, Multiplicity =1

|    |             |             |             |
|----|-------------|-------------|-------------|
| C  | 2.08198900  | -0.73242500 | -0.36735700 |
| C  | 3.02043900  | 0.24772000  | -0.18050000 |
| Cl | 4.69470500  | 0.08380000  | 0.24179100  |
| Cl | 2.33479200  | -2.43615500 | -0.28684400 |
| C  | 2.37552300  | 1.53420200  | -0.39340200 |
| O  | 2.80330800  | 2.67473000  | -0.33069200 |
| O  | 1.05954100  | 1.26440600  | -0.70949200 |
| C  | -0.27860300 | -0.38592800 | 0.99895700  |
| C  | -1.55906700 | 0.34941300  | 0.59307400  |
| C  | -2.67219600 | -0.43249000 | 0.24501400  |
| C  | -1.66902500 | 1.74559300  | 0.59907800  |

|   |             |             |             |
|---|-------------|-------------|-------------|
| C | -3.88047800 | 0.17447900  | -0.11600500 |
| H | -2.54699100 | -1.51393900 | 0.29252700  |
| C | -2.88261100 | 2.35049600  | 0.24618900  |
| H | -0.80920600 | 2.35809000  | 0.87640000  |
| C | -3.98582900 | 1.57732500  | -0.11511200 |
| H | -2.97247800 | 3.44009800  | 0.25380500  |
| H | 0.37391300  | 0.29595600  | 1.61455700  |
| O | -0.36757800 | -1.61720600 | 1.30798300  |
| C | 0.79083900  | -0.12709700 | -0.56938900 |
| H | 0.14616700  | -0.50126400 | -1.36997400 |
| H | -4.93812300 | 2.03471800  | -0.39184400 |
| O | -5.01375600 | -0.50528700 | -0.47474600 |
| C | -4.95956100 | -1.92735400 | -0.49579700 |
| H | -5.95411500 | -2.26376200 | -0.81642300 |
| H | -4.20199400 | -2.29515200 | -1.20947700 |
| H | -4.73927700 | -2.34147900 | 0.50341100  |

#### 4S

|                                                 |                             |
|-------------------------------------------------|-----------------------------|
| Zero-point correction=                          | 0.197666 (Hartree/Particle) |
| Thermal correction to Energy=                   | 0.218695                    |
| Thermal correction to Enthalpy=                 | 0.219639                    |
| Thermal correction to Gibbs Free Energy=        | 0.144658                    |
| Sum of electronic and zero-point Energies=      | -2001.829890                |
| Sum of electronic and thermal Energies=         | -2001.808861                |
| Sum of electronic and thermal Enthalpies=       | -2001.807917                |
| Sum of electronic and thermal Free Energies=    | -2001.882898                |
| 1 Imaginary frequency = -230.5 cm <sup>-1</sup> |                             |
| Charge = -1, Multiplicity =1                    |                             |

|    |             |             |             |
|----|-------------|-------------|-------------|
| C  | -3.13803100 | 0.30694000  | -0.39709900 |
| C  | -3.77964700 | -0.89723000 | -0.23084200 |
| Cl | -5.43613900 | -1.19530800 | 0.18843700  |
| Cl | -3.83481100 | 1.88041300  | -0.26823200 |
| C  | -2.81295900 | -1.95547900 | -0.45632900 |
| O  | -2.90842000 | -3.17120100 | -0.41321900 |
| O  | -1.61301600 | -1.32909400 | -0.75619500 |
| C  | -0.79614200 | 0.59633200  | 1.08797300  |
| C  | 0.59526600  | 0.13126100  | 0.69734200  |
| C  | 1.55574000  | 1.02250000  | 0.19271300  |
| C  | 1.02687200  | -1.18015100 | 0.95266100  |
| C  | 2.88139900  | 0.66392800  | -0.02655700 |
| C  | 2.34114200  | -1.57517900 | 0.71627400  |
| H  | 0.30980800  | -1.89368500 | 1.36258500  |
| C  | 3.28215800  | -0.65481800 | 0.22916700  |
| H  | 2.66314200  | -2.59698100 | 0.92003500  |
| H  | -1.32922200 | -0.21511000 | 1.64787700  |
| O  | -0.96085200 | 1.80856500  | 1.38994500  |
| C  | -1.74518800 | 0.07253900  | -0.61152700 |
| H  | -1.17131200 | 0.64670600  | -1.34040100 |
| H  | 3.59340100  | 1.39698000  | -0.40209000 |
| N  | 1.19056900  | 2.40381200  | -0.18717000 |
| O  | 1.79595900  | 3.31769100  | 0.36053500  |
| O  | 0.38165300  | 2.54914200  | -1.09607100 |
| C  | 4.68294400  | -1.11407200 | 0.00773400  |
| O  | 5.07290100  | -2.24755500 | 0.22171900  |

|   |            |             |             |
|---|------------|-------------|-------------|
| O | 5.47740100 | -0.13218800 | -0.45872000 |
| C | 6.85084700 | -0.49379800 | -0.69834200 |
| H | 6.91285100 | -1.29420400 | -1.44984000 |
| H | 7.33470700 | 0.41777100  | -1.06674800 |
| H | 7.32737900 | -0.83446100 | 0.23231800  |

## 5S

|                                                 |                             |
|-------------------------------------------------|-----------------------------|
| Zero-point correction=                          | 0.294872 (Hartree/Particle) |
| Thermal correction to Energy=                   | 0.320057                    |
| Thermal correction to Enthalpy=                 | 0.321001                    |
| Thermal correction to Gibbs Free Energy=        | 0.233428                    |
| Sum of electronic and zero-point Energies=      | -2099.816077                |
| Sum of electronic and thermal Energies=         | -2099.790892                |
| Sum of electronic and thermal Enthalpies=       | -2099.789947                |
| Sum of electronic and thermal Free Energies=    | -2099.877520                |
| 1 Imaginary frequency = -187.3 cm <sup>-1</sup> |                             |
| Charge = -1, Multiplicity =1                    |                             |

|    |             |             |             |
|----|-------------|-------------|-------------|
| C  | 3.12866600  | -0.02022400 | -0.49968500 |
| C  | 3.31028100  | 0.46013700  | 0.76072000  |
| Cl | 4.79394100  | 0.67702600  | 1.63356300  |
| Cl | 4.38223300  | -0.51905600 | -1.58552300 |
| C  | 1.99474600  | 0.80483200  | 1.33452000  |
| O  | 1.72971300  | 1.31628600  | 2.42679000  |
| C  | 1.42824400  | -1.99758700 | -1.12873300 |
| C  | 0.01699100  | -2.25976900 | -0.61298100 |
| C  | -1.03409700 | -2.36223900 | -1.53972300 |
| C  | -0.25590000 | -2.47210200 | 0.75028200  |
| C  | -2.33471500 | -2.63259000 | -1.12457100 |
| H  | -0.78822400 | -2.23713600 | -2.59530800 |
| C  | -1.54786000 | -2.75102600 | 1.18738300  |
| H  | 0.55834700  | -2.42444100 | 1.47729500  |
| C  | -2.57721700 | -2.82186000 | 0.24104700  |
| H  | -3.15981800 | -2.70942300 | -1.83149400 |
| H  | -1.77348100 | -2.91864500 | 2.23944100  |
| H  | 2.14841400  | -2.39819200 | -0.36158800 |
| O  | 1.65769100  | -2.20915200 | -2.37177700 |
| C  | 1.69902400  | -0.17259300 | -0.78613400 |
| H  | 1.34343800  | 0.21145400  | -1.74953300 |
| N  | -3.93879300 | -3.11673000 | 0.69064600  |
| O  | -4.12990200 | -3.28997100 | 1.89420000  |
| O  | -4.83115500 | -3.17613400 | -0.15502500 |
| N  | 1.08107800  | 0.43972900  | 0.36451300  |
| C  | -0.29922200 | 0.89507200  | 0.41275500  |
| H  | -0.64956400 | 0.80829000  | 1.45064800  |
| H  | -0.91461100 | 0.22798300  | -0.20186200 |
| C  | -0.44954300 | 2.34418600  | -0.06479100 |
| H  | 0.13073000  | 3.02860300  | 0.57460500  |
| H  | -0.05416000 | 2.46737900  | -1.08740500 |
| C  | -1.89163500 | 2.80009200  | -0.06775000 |
| O  | -2.84719900 | 2.09890600  | 0.20431000  |
| O  | -1.99426100 | 4.09506400  | -0.41926500 |
| C  | -3.33668400 | 4.64579400  | -0.47417300 |
| H  | -3.80078200 | 4.54227200  | 0.51920700  |
| H  | -3.93167200 | 4.05317900  | -1.18668000 |

|   |             |            |             |
|---|-------------|------------|-------------|
| C | -3.21725500 | 6.09443400 | -0.89873900 |
| H | -4.21912300 | 6.54829000 | -0.95208000 |
| H | -2.61550900 | 6.66915600 | -0.17740500 |
| H | -2.74697300 | 6.17741700 | -1.89105600 |

## 6S

Zero-point correction= 0.305602 (Hartree/Particle)  
Thermal correction to Energy= 0.329473  
Thermal correction to Enthalpy= 0.330417  
Thermal correction to Gibbs Free Energy= 0.245992  
Sum of electronic and zero-point Energies= -2063.662020  
Sum of electronic and thermal Energies= -2063.638149  
Sum of electronic and thermal Enthalpies= -2063.637205  
Sum of electronic and thermal Free Energies= -2063.721629  
1 Imaginary frequency = -186.0 cm<sup>-1</sup>  
Charge = -1, Multiplicity = 1

|    |             |             |             |
|----|-------------|-------------|-------------|
| C  | 3.26969200  | 0.09288100  | -0.49946400 |
| C  | 3.40286300  | 0.69803800  | 0.71194800  |
| Cl | 4.85218000  | 1.01006500  | 1.61347300  |
| Cl | 4.56397900  | -0.50618200 | -1.48271100 |
| C  | 2.06476300  | 1.08639300  | 1.20126400  |
| O  | 1.75916900  | 1.70179300  | 2.22727500  |
| C  | 1.60353600  | -1.94822000 | -1.00987800 |
| C  | 0.20028100  | -2.18833800 | -0.46378900 |
| C  | -0.84942100 | -2.41295100 | -1.37017000 |
| C  | -0.06551600 | -2.26156300 | 0.91545100  |
| C  | -2.14222800 | -2.67104500 | -0.92370100 |
| H  | -0.60748700 | -2.39262100 | -2.43383200 |
| C  | -1.34950900 | -2.52349800 | 1.38469300  |
| H  | 0.74841200  | -2.11776500 | 1.63000500  |
| C  | -2.37822200 | -2.72023500 | 0.45519700  |
| H  | -2.96602200 | -2.84294800 | -1.61528000 |
| H  | -1.56935900 | -2.58367700 | 2.44954600  |
| H  | 2.33283100  | -2.27810400 | -0.21814600 |
| O  | 1.83146300  | -2.25543400 | -2.23365100 |
| C  | 1.85178300  | -0.09898800 | -0.82031000 |
| H  | 1.52755200  | 0.18584500  | -1.82801000 |
| N  | -3.73108300 | -3.00022200 | 0.93860500  |
| O  | -3.91695300 | -3.04791100 | 2.15451600  |
| O  | -4.62235600 | -3.17330700 | 0.10739400  |
| N  | 1.18843500  | 0.61626900  | 0.24218700  |
| C  | -0.19309500 | 1.06845000  | 0.19000500  |
| H  | -0.57540400 | 1.10142000  | 1.22082400  |
| H  | -0.78313700 | 0.32746600  | -0.36499600 |
| C  | -0.34257800 | 2.46211500  | -0.46056300 |
| H  | 0.25796200  | 3.18076500  | 0.11895400  |
| H  | 0.07507100  | 2.42690400  | -1.47979400 |
| C  | -1.78610200 | 2.91100400  | -0.50761800 |
| C  | -2.59619400 | 2.62249200  | -1.61856300 |
| C  | -2.36333800 | 3.59000600  | 0.57875800  |
| C  | -3.94218200 | 3.00176200  | -1.64568900 |
| H  | -2.16475500 | 2.09805500  | -2.47581500 |
| C  | -3.70883500 | 3.97069500  | 0.55635400  |
| H  | -1.74814600 | 3.82770900  | 1.45120300  |

|   |             |            |             |
|---|-------------|------------|-------------|
| C | -4.50398200 | 3.67728400 | -0.55697000 |
| H | -4.55322500 | 2.77155100 | -2.52193200 |
| H | -4.13686500 | 4.50177500 | 1.41010600  |
| H | -5.55448200 | 3.97645900 | -0.57731700 |

## 7S

Zero-point correction= 0.168015 (Hartree/Particle)  
Thermal correction to Energy= 0.184533  
Thermal correction to Enthalpy= 0.185478  
Thermal correction to Gibbs Free Energy= 0.120775  
Sum of electronic and zero-point Energies= -1754.109622  
Sum of electronic and thermal Energies= -1754.093103  
Sum of electronic and thermal Enthalpies= -1754.092159  
Sum of electronic and thermal Free Energies= -1754.156862  
1 Imaginary frequency = -219.0 cm<sup>-1</sup>  
Charge = -1, Multiplicity = 1

|    |             |             |             |
|----|-------------|-------------|-------------|
| C  | 2.62047900  | -0.50084400 | -0.39727300 |
| C  | 3.16207800  | 0.73306900  | -0.16686400 |
| Cl | 4.78411800  | 1.12786100  | 0.31237500  |
| Cl | 3.46642200  | -2.01245900 | -0.36380000 |
| C  | 2.11818200  | 1.75660900  | -0.36009000 |
| O  | 2.17822500  | 2.98044000  | -0.20472100 |
| C  | 0.26459500  | -1.20367100 | 0.84997100  |
| C  | -1.14871100 | -0.71264100 | 0.56620400  |
| C  | -2.04631600 | -1.58348500 | -0.07683500 |
| C  | -1.60598800 | 0.55530000  | 0.96994900  |
| C  | -3.35459900 | -1.19706500 | -0.34664400 |
| H  | -1.68386800 | -2.57772500 | -0.34235200 |
| C  | -2.91514300 | 0.96009400  | 0.71589200  |
| H  | -0.93246200 | 1.22803300  | 1.50645200  |
| C  | -3.77458600 | 0.07789300  | 0.05258000  |
| H  | -4.05750000 | -1.86048200 | -0.84874700 |
| H  | -3.28263000 | 1.93658300  | 1.02769100  |
| H  | 0.74970500  | -0.53981800 | 1.61640100  |
| O  | 0.46659500  | -2.45781700 | 0.86734400  |
| C  | 1.19448900  | -0.38538900 | -0.65381800 |
| H  | 0.77589700  | -0.98464400 | -1.46993900 |
| N  | -5.15268400 | 0.49289200  | -0.21649900 |
| O  | -5.50484200 | 1.61402800  | 0.14903200  |
| O  | -5.89486700 | -0.29815800 | -0.79785900 |
| N  | 1.01317700  | 1.03033700  | -0.75770000 |
| H  | 0.10046400  | 1.46644400  | -0.82466600 |
